# Supplementary material
Source: PubMed Central journal article supplement (PMC8724442)
Supplement: NIHMS1759905-supplement-1.pdf [file NIHMS1759905-supplement-1.pdf]

## Supplementary Tables

**Suppl. Table 1. Studies reporting the impact of MB-FUS delivery of anticancer agents in murine brain tumor models.**

| Therapeutic agent     | Size   | Tumor model <sup>a</sup>                       | Fold increase in DD<br>(W.R.T. drug only) | Increase [%] in median<br>survival (W.R.T. drug only) | Ref  |
|-----------------------|--------|------------------------------------------------|-------------------------------------------|-------------------------------------------------------|------|
| <b>Chemotherapy</b>   |        |                                                |                                           |                                                       |      |
| Doxorubicin           | 580 Da | GL261 and SMA-560 glioma<br>(B6-albino mouse)  | 4-fold                                    | 68.2%                                                 | [1]  |
| Doxorubicin           | 580 Da | 9L Gliosarcoma<br>(Rat)                        | 2-fold                                    | -                                                     | [2]  |
| BCNU                  | 214 Da | C6 glioma model<br>(Rat)                       | 3-fold                                    | 65.6%                                                 | [3]  |
| Temozolomide<br>(TMZ) | 194 Da | 9L Gliosarcoma<br>(Rat)                        | 1.7-fold                                  | 12.2%                                                 | [4]  |
| Temozolomide<br>(TMZ) | 194 Da | 9L Gliosarcoma<br>(Rat)                        | -                                         | -                                                     | [5]  |
| Temozolomide<br>(TMZ) | 194 Da | U87 glioma model<br>(Mouse)                    | 2-fold                                    | 12.5%                                                 | [6]  |
| Carboplatin           | 380 Da | F98 glioma<br>(Rat)                            | 2.9-fold                                  | 48%                                                   | [7]  |
| Irinotecan            | 580 Da | F98 glioma<br>(Rat)                            | 3.2-fold                                  | 0% (No improvement)                                   | [8]  |
| Doxorubicin           | 580 Da | SU-DIPG-17 orthotopic<br>xenografts<br>(mouse) | 4-fold                                    | 0% (No improvement)                                   | [9]  |
| Etoposide             | 590 Da | MGPP3 glioma (mouse)                           | 3.5-fold                                  | 31.6%                                                 | [10] |

|                                                        |            |                                          |                                             |                     |      |
|--------------------------------------------------------|------------|------------------------------------------|---------------------------------------------|---------------------|------|
| Carboplatin                                            | 588 Da     | U87 and 6240 PDX (mouse)                 | No quantification for carboplatin in tumor. | -                   | [11] |
| Doxorubicin                                            | 580 Da     | Human HER2 <sup>+</sup> BT474 (mouse)    | 7-fold                                      | -                   | [12] |
| Etoposide                                              | 590 Da     | Diffuse intrinsic pontine glioma (mouse) | 5-fold                                      | -                   | [13] |
| <b>Antibody</b>                                        |            |                                          |                                             |                     |      |
| Herceptin (trastuzumab)                                | 148 kDa    | Human HER2-positive BT474 (Rat)          | -                                           | -                   | [14] |
| HER2-targeting antibodies (trastuzumab and pertuzumab) | 148 kDa    | Human HER2-positive MDA-MB-361 (Rat)     | -                                           | -2.7%               | [15] |
| Interleukin-12 (IL-12)                                 | 75 kDa     | C6 glioma (Rat)                          | 1.5-fold                                    | 15.4%               | [16] |
| Bevacizumab                                            | 150 kDa    | U87 glioma (Mouse)                       | 6-fold                                      | 58.7%               | [17] |
| EphA2-4B3 (IgG2a)                                      | 130 kDa    | High grade glioma (PDX)                  | 2-fold                                      | -                   | [18] |
| Anti-CD47                                              | 150 kDa    | GL261 Glioma (mouse)                     | 2.2-fold                                    | 40%                 | [19] |
| ado-trastuzumab emtansine (T-DM1)                      | 148 kDa    | Human HER2 <sup>+</sup> BT474 (mouse)    | 2-fold                                      | -                   | [12] |
| Anti-PD-1                                              | 32kDa      | GL261 glioma model (mouse)               |                                             | 48.7%               | [20] |
| <b>Nanoparticles</b>                                   |            |                                          |                                             |                     |      |
| Liposomal doxorubicin (Doxil)                          | 90 nm      | 9L Gliosarcoma (Rats)                    | -                                           | 0% (No improvement) | [21] |
| AP-1 targeted - Liposomal doxorubicin                  | 116± 30 nm | Human GBM 8401 (NOD-scid)                | 2.5-fold                                    | -                   | [22] |

| (AP-1-Lipo-DOX)                                                                           |                        | Mice)                                |                                                                                      |                                            |      |
|-------------------------------------------------------------------------------------------|------------------------|--------------------------------------|--------------------------------------------------------------------------------------|--------------------------------------------|------|
| Liposomal doxorubicin (Lipo-DOX);<br>AP-1 targeted - Liposomal doxorubicin (AP1-Lipo-DOX) | 100-120 nm             | Human GBM 8401 (NOD-scid Mice)       | 4.4-fold (untargeted liposomal doxorubicin)<br>3.7-fold (AP-1 liposomal doxorubicin) | -                                          | [23] |
| Liposomal doxorubicin (Lipo-DOX)                                                          | 90 nm                  | 9L Gliosarcoma (Rat)                 |                                                                                      | 72%                                        | [24] |
| Cisplatin in Brain-Penetrating Nanoparticles                                              | 60 nm                  | 9L Gliosarcoma and F98 glioma (Rats) | 28-fold                                                                              | 0% (No improvement)                        | [25] |
| Paclitaxel liposomes (PTX-LIPO)                                                           | ~90 nm                 | U87 MG glioblastoma (Mice)           | 2-fold                                                                               | 14.8%                                      | [26] |
| Liposomal doxorubicin (Lipo-DOX)                                                          | 90 nm                  | 9L Gliosarcoma (Rat)                 | 2-fold                                                                               | -                                          | [27] |
| Cilengitide (CGT) (Peptide)                                                               | 100 nm<br>588.67 g/mol | C6 glioma model (Rat)                | -                                                                                    | 17.4% (CGT-modified-NP)<br>166.4% (CGT-NP) | [28] |
| $\alpha$ EGFR-SERS440 Gold Nanoparticles (GNPs)                                           | 50-120 nm (PEG-coated) | 9L gliosarcoma model (Rat)           | no <i>in vivo</i> statistics were provided                                           | -                                          | [29] |
| IL-4 receptor targeted Liposomal doxorubicin (IL-4-Lipo-DOX)                              | 100-120 nm             | Human GBM 8401 model (NOD-scid Mice) | 2-fold                                                                               | 15.4%                                      | [30] |
| Liposomal doxorubicin (Lipo-DOX)                                                          | 90 nm                  | 9L Gliosarcoma (Rat)                 | 7-fold                                                                               | -                                          | [31] |
| Liposomal doxorubicin (Doxil)                                                             | 90 nm                  | F98 glioma (Rats)                    | 10-fold                                                                              |                                            | [32] |

|                                                    |                                   |                                          |          |                                                              |      |
|----------------------------------------------------|-----------------------------------|------------------------------------------|----------|--------------------------------------------------------------|------|
| Albumin-bound paclitaxel                           | 130 nm                            | MES83 and GBM12 Glioma PDX (mice)        | -        | 12.9% (MES83)<br>7.9% (GBM12, not statistically significant) | [33] |
| Folate-conjugated Polymersomal (Doxorubicin) (FPD) |                                   | C6 glioma model (Rat)                    | 5.1-fold | 51.7%                                                        | [34] |
| Hollow mesoporous organosilica NPs (Doxorubicin)   | 50 nm                             | U87 glioblastoma model (Mice)            | -        | 48.6%                                                        | [35] |
| cisplatin-gold-NP conjugates                       | 7 nm                              | U251 GBM xenograft (NOD-scid Mice)       | -        | -                                                            | [36] |
| brain-penetrating nanoparticle (BPN) gene vectors  | 50-100 nm                         | U87 glioma B16F1 melanoma (mice)         | 2.3-fold | -                                                            | [37] |
| LPH (siRNA)                                        | 40-50 nm                          | GL261 Glioma, SMO medulloblastoma (mice) | 10-fold  | -                                                            | [38] |
| <b>Magnetic Nanoparticles</b>                      |                                   |                                          |          |                                                              |      |
| BCNU - MNP                                         | ~10–20 nm                         | C6 glioma (Rat)                          | -        | no survival values were provided                             | [39] |
| Epirubicin - MNP                                   | ~12 nm                            | C6 glioma (Rat)                          | 2.6-fold | -                                                            | [40] |
| Doxorubicin – SPIO                                 | ~36 nm (SPIO);<br>~3 μm;<br>(MBs) | C6 glioma (Rat)                          | 2-fold   | -                                                            | [41] |
| <b>Microbubble-drug conjugates</b>                 |                                   |                                          |          |                                                              |      |
| BCNU                                               | 214 Da (BCNU);<br>~1 μm (MBs)     | C6 glioma (Rat)                          | 8-fold   | 12%                                                          | [42] |

|                                                                      |                                            |                                                        |                                       |                                        |      |
|----------------------------------------------------------------------|--------------------------------------------|--------------------------------------------------------|---------------------------------------|----------------------------------------|------|
| VEGFR2-BCNU<br>(Antiangiogenic-targeting)                            | 214 Da<br>(BCNU);<br>~1.8 µm<br>(MBs)      | C6 glioma<br>(Rat)                                     | -                                     | 61.5%                                  | [43] |
| Doxorubicin – SPIO                                                   | ~36 nm<br>(SPIO);<br>~1 µm<br>(MBs)        | C6 glioma<br>(Rat)                                     | 1.6-fold                              | -                                      | [44] |
| shBirc5-lipo-NGR<br>(NGR peptide and shRNA<br>dual targeting)        | 2.9 µm<br>MB-drug<br>complex               | C6 glioma<br>(Rat)                                     | -                                     | 40.7%                                  | [45] |
| PEBCA-based NP<br>(nanoparticles)                                    | 274nm (NP);<br>1.6 µm (MBs)                | H1_DL2 Melanoma brain<br>metastases<br>(NOD-scid Mice) | No quantification for<br>NP in tumor. | -                                      | [46] |
| LPHNs-cRGD<br>(nanoparticles loaded<br>with CRISPR/Cas9<br>plasmids) | 179 nm (NP)<br>2.9 µm (MB-drug<br>complex) | T98G Glioma<br>(NOD-SCID mice)                         | -                                     | 65.4%                                  |      |
| <b>Virus</b>                                                         |                                            |                                                        |                                       |                                        |      |
| Herpes virus gene<br>(HSV1-tk) with<br>Ganciclovir prodrug (GCV)     | 5.5 MDa<br>(152 kbp)                       | F98 glioma<br>(Rats)                                   | 3-fold                                | -                                      | [47] |
| Herpes virus gene<br>(HSV1-tk) with<br>Ganciclovir prodrug (GCV)     | 5.5 MDa<br>(152 kbp)                       | C6 glioma<br>(Rat)                                     | 2.3-fold                              | Survival for drug only not<br>reported | [48] |

**Suppl. Table 2. Summary of studies reporting the impact of MB-FUS on BBB in healthy animals that included information about the acoustic emissions and tissue damage; summarized in Fig. 4.**

| Animal  | Pressure | Frequency | Harmonic | U-harmonic | Broadband | BBB Opening | Damage | Ref. |
|---------|----------|-----------|----------|------------|-----------|-------------|--------|------|
| Rat     | 371 kPa  | 0.230MHz  | Yes      | Yes        | Yes       | Yes         | Yes    | [49] |
| Macaque | 100 kPa  | 0.22MHz   | NO       | NO         | NO        | NO          | NO     | [50] |
|         | 150 kPa  | 0.22MHz   | YES      | NO         | NO        | YES         | NO     |      |
|         | 300 kPa  | 0.22MHz   | YES      | YES        | NO        | YES         | YES    |      |
| Macaque | 175 kPa  | 0.257MHz  | NO       | NO         | NO        | NO          | NO     | [51] |
|         | 275 kPa  | 0.257MHz  | YES      | YES        | SOME      | YES         | NO     |      |
|         | 275 kPa  | 0.257MHz  | YES      | YES        | YES       | YES         | YES    |      |
| Mouse   | 300 kPa  | 1.5MHz    | YES      | NO         | NO        | YES         | NO     | [52] |
|         | 450 kPa  | 1.5MHz    | YES      | YES        | SOME      | YES         | YES    |      |
|         | 600 kPa  | 1.5MHz    | YES      | YES        | YES       | YES         | YES    |      |
| Macaque | 300 kPa  | 0.5MHz    | YES      | YES        | FEW       | YES         | NO     | [53] |
|         | 450 kPa  | 0.5MHz    | YES      | YES        | SOME      | YES         | NO     |      |
|         | 600 kPa  | 0.5 MHz   | YES      | YES        | YES       | YES         | YES    |      |
|         | 275 kPa  | 0.5 MHz   | YES      | NO         | NO        | YES         | NO     |      |
|         | 400 kPa  | 0.5 MHz   | YES      | YES        | NO        | YES         | NO     |      |
|         | 450 kPa  | 0.5 MHz   | YES      | YES        | YES       | YES         | NO     |      |
| Mouse   | 150 kPa  | 1.53 MHz  | SOME     | NO         | NO        | NO          | NO     | [54] |
|         | 300 kPa  | 1.53 MHz  | YES      | YES        | NO        | YES         | NO     |      |
|         | 450 kPa  | 1.53 MHz  | YES      | YES        | SOME      | YES         | NO     |      |
|         | 600 kPa  | 1.53 MHz  | YES      | YES        | YES       | YES         | YES    |      |
| Mouse   | 150 kPa  | 1.5 MHz   | YES      | NO         | NO        | NO          | NO     | [55] |
|         | 300 kPa  | 1.5 MHz   | YES      | NO         | NO        | NO          | NO     |      |
|         | 450 kPa  | 1.5 MHz   | YES      | YES        | YES       | YES         | NO     |      |
|         | 600 kPa  | 1.5 MHz   | YES      | YES        | YES       | YES         | YES    |      |
|         | 150 kPa  | 1.5 MHz   | YES      | NO         | NO        | NO          | NO     |      |
|         | 300 kPa  | 1.5 MHz   | YES      | NO         | NO        | YES         | NO     |      |
|         | 450 kPa  | 1.5 MHz   | YES      | YES        | YES       | YES         | YES    |      |
|         | 600 kPa  | 1.5 MHz   | YES      | YES        | YES       | YES         | YES    |      |
|         | 150 kPa  | 1.5 MHz   | YES      | NO         | NO        | NO          | NO     |      |
|         | 300 kPa  | 1.5 MHz   | YES      | NO         | NO        | YES         | NO     |      |
|         | 450 kPa  | 1.5 MHz   | YES      | YES        | YES       | YES         | YES    |      |
| 600 kPa | 1.5 MHz  | YES       | YES      | YES        | YES       | YES         |        |      |
| Macaque | 275 kPa  | 0.5 MHz   | YES      | YES        | NO        | YES         | NO     | [56] |
|         | 350 kPa  | 0.5 MHz   | YES      | YES        | NO        | YES         | NO     |      |
|         | 450 kPa  | 0.5 MHz   | YES      | YES        | NO        | YES         | NO     |      |
|         | 600 kPa  | 0.5 MHz   | YES      | YES        | NO        | YES         | NO     |      |
| Mouse   | 0.41 MI  |           | YES      | NO         | NO        | YES         | NO     | [57] |
|         | 0.56 MI  |           | YES      | NO         | NO        | YES         | NO     |      |
|         | 1.12 MI  |           | YES      | YES        | YES       | YES         | YES    |      |
|         | 0.43 MI  |           | YES      | NO         | NO        | YES         | NO     |      |
|         | 0.83 MI  |           | yes      | yes        | yes       | yes         | yes    |      |

|        |          |          |     |      |      |      |     |         |
|--------|----------|----------|-----|------|------|------|-----|---------|
| Rabbit | 140 kPa  | 0.26 MHz | YES | NO   | NO   | NO   | NO  | [58]    |
|        | 290 kPa  | 0.26 MHz | YES | YES  | NO   | YES  | NO  |         |
|        | 400 kPa  | 0.26 MHz | YES | YES  | SOME | YES  | YES |         |
|        | 570 kPa  | 0.26 MHz | YES | YES  | YES  | YES  | YES |         |
| Mouse  | 150 kPa  | 1.5 MHz  | NO  | NO   | NO   | NO   | NO  | [59]*   |
|        | 300 kPa  | 1.5 MHz  | YES | NO   | NO   | YES  | NO  |         |
|        | 450 kPa  | 1.5 MHz  | YES | YES  | NO   | YES  | NO  |         |
| Mouse  | 450 kPa  | 1.5 MHz  | YES | SOME | NO   | YES  | NO  | [60]**  |
|        | 1500 kPa | 1.5 MHz  | YES | YES  | YES  | YES  | YES |         |
| Mouse  | 450 kPa  | 1.5 MHz  | YES | NO   | NO   | NO   | NO  | [61]    |
|        | 750 kPa  | 1.5 MHz  | YES | YES  | YES  | YES  | YES |         |
| Mouse  | 225 kPa  | 1.5 MHz  | YES | NO   | NO   | NO   | NO  | [62]*** |
|        | 300 kPa  | 1.5 MHz  | YES | NO   | NO   | YES  | NO  |         |
|        | 450 kPa  | 1.5 MHz  | YES | YES  | SOME | YES  | NO  |         |
|        | 600 kPa  | 1.5 MHz  | YES | YES  | YES  | YES  | YES |         |
| Mouse  | 200 kPa  | 0.5 MHz  | YES | YES  | NO   | YES  | NO  | [63]    |
|        | 300 kPa  | 0.5 MHz  | YES | YES  | YES  | SOME | NO  |         |
|        | 600 kPa  | 0.5 MHz  | YES | YES  | YES  | YES  | YES |         |

\* Only data from OFB were used.

\*\* Only data from Definity were used.

\*\*\* Only data from C24, 1000 cycles were used.

Note : The metanalysis contains publications in which focal pressure, excitation frequency, level of harmonics, ultraharmonics, broadband, BBB-opening evidence, and T2/histology were reported. Mechanical indices were calculated by dividing reported/estimated in-skull pressure (in megapascals) by square root of frequency in megahertz).

**Suppl. Table 3. Summary of studies reporting the impact of MB-FUS alone on survival in murine brain tumor models.**

| Tumor model                      | Frequency [MHz] | Pressure ( $P_{-}$ ) [MPa] | M.I.        | Microbubble Type     | Key findings                                                                                |
|----------------------------------|-----------------|----------------------------|-------------|----------------------|---------------------------------------------------------------------------------------------|
| SMA-560 glioma (B6-albino mouse) | 0.6             | 0.4                        | 0.52        | BG6895 infusion      | No difference in median survival time. [64]                                                 |
| C6 glioma (Rat)                  | 0.4             | 0.62                       | 0.98        | Sonovue 0.0025 mg/kg | Median survival time decreased by 10.5% after FUS (not statistically significant). [65, p.] |
| U87 glioma (Mouse)               | 0.5             | 0.3 - 0.7                  | 0.42 - 0.99 | Sonovue 4 $\mu$ g    | Modest improvement in survival (IST median 8.6%). Not statistically significant. [66]       |
| MGPP3 glioma (mouse)             | 1.5             | 0.7                        | 0.57        | Lipid shell 1 mL/kg  | No difference in median survival time. [67]                                                 |
| C6 glioma (Rat)                  | 0.5             | 0.36 - 0.7                 | 0.51 - 0.99 | Sonovue 0.1 mL/kg    | Modest improvement in survival (IST median 9.5%). Not statistically significant. [68]       |
| U87 glioma (Mouse)               | 0.4             | 0.4                        | 0.63        | Sonovue 10 $\mu$ L   | Modest improvement in survival (IST median 9.68%). Not                                      |

|                      |      |             |             |                         |                                                                                                                |
|----------------------|------|-------------|-------------|-------------------------|----------------------------------------------------------------------------------------------------------------|
|                      |      |             |             |                         | statistically significant (P=0.5407). [69]                                                                     |
| GL261 Glioma (mouse) | 1.1  | 0.4         | 0.38        | Albumin shell 1E5 MBs/g | No statistically significant difference in median survival time. [70]                                          |
| 9L Gliosarcoma (Rat) | 1.7  | 0.6         | 0.46        | Definity 0.01 mL/kg     | No difference in median survival time. [71]                                                                    |
| 9L Gliosarcoma (Rat) | 0.69 | 0.55 - 0.81 | 0.66 - 0.98 | Definity 0.01 ml/kg     | Multiple treatments with ultrasound shows no difference in median survival time compares to non-FUS group.[72] |
| U87 glioma (Mouse)   | 1.1  | 0.6         | 0.57        | Lipid shell 0.2 ml/kg   | No difference in median survival time. [73]                                                                    |
| U87 glioma (Mouse)   | 1    | 0.3         | 0.3         | -                       | No difference in median survival time. [74]                                                                    |
| C6 glioma (Rat)      | 1    | -           | -           | Lipid shell bubble      | Modest improvement in survival (IST median 14%). Not statistically significant. [75]                           |
| Average              | -    | 0.48 - 0.58 | 0.55 - 0.68 | -                       | No statistically significant improvement in survival                                                           |
| Median               | -    | 0.4 - 0.6   | 0.52 - 0.57 | -                       |                                                                                                                |

## References

- [1] Z. Kovacs, B. Werner, A. Rassi, J. O. Sass, E. Martin-Fiori, and M. Bernasconi, "Prolonged survival upon ultrasound-enhanced doxorubicin delivery in two syngenic glioblastoma mouse models," *Journal of Controlled Release*, vol. 187, pp. 74–82, Aug. 2014.
- [2] J. Park, M. Aryal, N. Vykhodtseva, Y.-Z. Zhang, and N. McDannold, "Evaluation of permeability, doxorubicin delivery, and drug retention in a rat brain tumor model after ultrasound-induced blood-tumor barrier disruption," *Journal of Controlled Release*, vol. 250, pp. 77–85, Mar. 2017.
- [3] H.-L. Liu, M.-Y. Hua, P.-Y. Chen, P.-C. Chu, C.-H. Pan, H.-W. Yang, C.-Y. Huang, J.-J. Wang, T.-C. Yen, and K.-C. Wei, "Blood-Brain Barrier Disruption with Focused Ultrasound Enhances Delivery of Chemotherapeutic Drugs for Glioblastoma Treatment," *Radiology*, vol. 255, no. 2, pp. 415–425, Apr. 2010.
- [4] K.-C. Wei, P.-C. Chu, H.-Y. J. Wang, C.-Y. Huang, P.-Y. Chen, H.-C. Tsai, Y.-J. Lu, P.-Y. Lee, I.-C. Tseng, L.-Y. Feng, P.-W. Hsu, T.-C. Yen, and H.-L. Liu, "Focused Ultrasound-Induced Blood–Brain Barrier Opening to Enhance Temozolomide Delivery for Glioblastoma Treatment: A Preclinical Study," *PLOS ONE*, vol. 8, no. 3, p. e58995, Mar. 2013.
- [5] Q. Dong, L. He, L. Chen, and Q. Deng, "Opening the Blood-Brain Barrier and Improving the Efficacy of Temozolomide Treatments of Glioblastoma Using Pulsed, Focused Ultrasound with a Microbubble Contrast Agent," *BioMed Research International*, vol. 2018, p. e6501508, Nov. 2018.
- [6] H.-L. Liu, C.-Y. Huang, J.-Y. Chen, H.-Y. J. Wang, P.-Y. Chen, and K.-C. Wei, "Pharmacodynamic and Therapeutic Investigation of Focused Ultrasound-Induced Blood-Brain Barrier Opening for Enhanced Temozolomide Delivery in Glioma Treatment," *PLOS ONE*, vol. 9, no. 12, p. e114311, Dec. 2014.
- [7] N. McDannold, Y. Zhang, J. G. Supko, C. Power, T. Sun, C. Peng, N. Vykhodtseva, A. J. Golby, and D. A. Reardon, "Acoustic feedback enables safe and reliable carboplatin delivery across the blood-brain barrier with a clinical focused ultrasound system and improves survival in a rat glioma model," *Theranostics*, vol. 9, no. 21, pp. 6284–6299, Aug. 2019.



- [8] N. McDannold, Y. Zhang, J. G. Supko, C. Power, T. Sun, N. Vykhodtseva, A. J. Golby, and D. A. Reardon, "Blood-brain barrier disruption and delivery of irinotecan in a rat model using a clinical transcranial MRI-guided focused ultrasound system," *Sci Rep*, vol. 10, May 2020.
- [9] J. Ishida, S. Alli, A. Bondoc, B. Golbourn, N. Sabha, K. Mikloska, S. Krumholtz, D. Srikanthan, N. Fujita, A. Luck, C. Maslink, C. Smith, K. Hynynen, and J. Rutka, "MRI-guided focused ultrasound enhances drug delivery in experimental diffuse intrinsic pontine glioma," *Journal of Controlled Release*, vol. 330, pp. 1034–1045, Feb. 2021.
- [10] H.-J. Wei, P. S. Upadhyayula, A. N. Pouliopoulos, Z. K. Englander, X. Zhang, C.-I. Jan, J. Guo, A. Mela, Z. Zhang, T. J. C. Wang, J. N. Bruce, P. D. Canoll, N. A. Feldstein, S. Zacharoulis, E. E. Konofagou, and C.-C. Wu, "Focused Ultrasound-Mediated Blood-Brain Barrier Opening Increases Delivery and Efficacy of Etoposide for Glioblastoma Treatment," *International Journal of Radiation Oncology\*Biophysics\*Physics*, Dec. 2020.
- [11] A. Dréan, N. Lemaire, G. Bouchoux, L. Goldwirt, M. Canney, L. Goli, A. Bouzidi, C. Schmitt, J. Guehennec, M. Verreault, M. Sanson, J.-Y. Delattre, K. Mokhtari, F. Sottolini, A. Carpentier, and A. Idbaih, "Temporary blood-brain barrier disruption by low intensity pulsed ultrasound increases carboplatin delivery and efficacy in preclinical models of glioblastoma," *J Neurooncol*, vol. 144, no. 1, pp. 33–41, Aug. 2019.
- [12] C. D. Arvanitis, V. Askoxylakis, Y. Guo, M. Datta, J. Kloepper, G. B. Ferraro, M. O. Bernabeu, D. Fukumura, N. McDannold, and R. K. Jain, "Mechanisms of enhanced drug delivery in brain metastases with focused ultrasound-induced tumor barrier disruption," *Proceedings of the National Academy of Sciences*, vol. 115, no. 37, pp. E8717–E8726, Sep. 2018.
- [13] Z. K. Englander, H.-J. Wei, A. N. Pouliopoulos, E. Bendau, P. Upadhyayula, C.-I. Jan, E. F. Spinazzi, N. Yoh, M. Tazhibi, N. M. McQuillan, T. J. C. Wang, J. N. Bruce, P. Canoll, N. A. Feldstein, S. Zacharoulis, E. E. Konofagou, and C.-C. Wu, "Focused ultrasound mediated blood-brain barrier opening is safe and feasible in a murine pontine glioma model," *Sci Rep*, vol. 11, no. 1, p. 6521, Mar. 2021.
- [14] E.-J. Park, Y.-Z. Zhang, N. Vykhodtseva, and N. McDannold, "Ultrasound-mediated blood-brain/blood-tumor barrier disruption improves outcomes with trastuzumab in a breast cancer brain metastasis model," *J Control Release*, vol. 163, no. 3, pp. 277–284, Nov. 2012.
- [15] T. Kobus, I. K. Zervantonakis, Y. Zhang, and N. J. McDannold, "Growth inhibition in a brain metastasis model by antibody delivery using focused ultrasound-mediated blood-brain barrier disruption," *J Control Release*, vol. 238, pp. 281–288, Sep. 2016.
- [16] P.-Y. Chen, H.-Y. Hsieh, C.-Y. Huang, C.-Y. Lin, K.-C. Wei, and H.-L. Liu, "Focused ultrasound-induced blood-brain barrier opening to enhance interleukin-12 delivery for brain tumor immunotherapy: a preclinical feasibility study," *J Transl Med*, vol. 13, Mar. 2015.
- [17] H.-L. Liu, P.-H. Hsu, C.-Y. Lin, C.-W. Huang, W.-Y. Chai, P.-C. Chu, C.-Y. Huang, P.-Y. Chen, L.-Y. Yang, J. S. Kuo, and K.-C. Wei, "Focused Ultrasound Enhances Central Nervous System Delivery of Bevacizumab for Malignant Glioma Treatment," *Radiology*, vol. 281, no. 1, pp. 99–108, May 2016.
- [18] C. Brighi, L. Reid, A. L. White, L. A. Genovesi, M. Kojic, A. Millar, Z. Bruce, B. W. Day, S. Rose, A. K. Whittaker, and S. Puttick, "MR-guided focused ultrasound increases antibody delivery to nonenhancing high-grade glioma," *Neuro Oncol Adv*, vol. 2, no. 1, Jan. 2020.
- [19] N. D. Sheybani, V. R. Breza, S. Paul, K. S. McCauley, S. S. Berr, G. W. Miller, K. D. Neumann, and R. J. Price, "ImmunoPET-informed sequence for focused ultrasound-targeted mCD47 blockade controls glioma," *Journal of Controlled Release*, vol. 331, pp. 19–29, Mar. 2021.
- [20] A. Sabbagh, K. Beccaria, X. Ling, A. Marisetty, M. Ott, H. Caruso, E. Barton, L.-Y. Kong, D. Fang, K. Latha, D. Y. Zhang, J. Wei, J. F. de Groot, M. A. Curran, G. Rao, J. Hu, C. Desseaux, G. Bouchoux, M. Canney, A. Carpentier, and A. B. Heimberger, "Opening of the blood-brain barrier using low-intensity pulsed ultrasound enhances responses to immunotherapy in preclinical glioma models," *Clin Cancer Res*, May 2021.
- [21] L. H. Treat, N. McDannold, Y. Zhang, N. Vykhodtseva, and K. Hynynen, "Improved Anti-Tumor Effect of Liposomal Doxorubicin After Targeted Blood-Brain Barrier Disruption by MRI-Guided Focused Ultrasound in Rat Glioma," *Ultrasound in Medicine & Biology*, vol. 38, no. 10, pp. 1716–1725, Oct. 2012.
- [22] F.-Y. Yang, H.-E. Wang, R.-S. Liu, M.-C. Teng, J.-J. Li, M. Lu, M.-C. Wei, and T.-T. Wong, "Pharmacokinetic Analysis of <sup>111</sup>In-Labeled Liposomal Doxorubicin in Murine Glioblastoma after Blood-Brain Barrier Disruption by Focused Ultrasound," *PLOS ONE*, vol. 7, no. 9, p. e45468, Sep. 2012.

- [23] F.-Y. Yang, M.-C. Teng, M. Lu, H.-F. Liang, Y.-R. Lee, C.-C. Yen, M.-L. Liang, and T.-T. Wong, "Treating glioblastoma multiforme with selective high-dose liposomal doxorubicin chemotherapy induced by repeated focused ultrasound," *Int J Nanomedicine*, vol. 7, pp. 965–974, 2012.
- [24] M. Aryal, N. Vykhodtseva, Y.-Z. Zhang, J. Park, and N. McDannold, "Multiple treatments with liposomal doxorubicin and ultrasound-induced disruption of blood-tumor and blood-brain barriers improves outcomes in a rat glioma model," *J Control Release*, vol. 169, no. 0, pp. 103–111, Jul. 2013.
- [25] K. F. Timbie, U. Afzal, A. Date, C. Zhang, J. Song, G. Wilson Miller, J. S. Suk, J. Hanes, and R. J. Price, "MR image-guided delivery of cisplatin-loaded brain-penetrating nanoparticles to invasive glioma with focused ultrasound," *Journal of Controlled Release*, vol. 263, pp. 120–131, Oct. 2017.
- [26] Y. Shen, Z. Pi, F. Yan, C.-K. Yeh, X. Zeng, X. Diao, Y. Hu, S. Chen, X. Chen, and H. Zheng, "Enhanced delivery of paclitaxel liposomes using focused ultrasound with microbubbles for treating nude mice bearing intracranial glioblastoma xenografts," *Int J Nanomedicine*, vol. 12, pp. 5613–5629, Aug. 2017.
- [27] M. Aryal, J. Park, N. Vykhodtseva, Y.-Z. Zhang, and N. McDannold, "Enhancement in blood-tumor barrier permeability and delivery of liposomal doxorubicin using focused ultrasound and microbubbles: evaluation during tumor progression in a rat glioma model," *Phys Med Biol*, vol. 60, no. 6, pp. 2511–2527, Mar. 2015.
- [28] Y.-Z. Zhao, Q. Lin, H. L. Wong, X.-T. Shen, W. Yang, H.-L. Xu, K.-L. Mao, F.-R. Tian, J.-J. Yang, J. Xu, J. Xiao, and C.-T. Lu, "Glioma-targeted therapy using Cilengitide nanoparticles combined with UTMD enhanced delivery," *Journal of Controlled Release*, vol. 224, pp. 112–125, Feb. 2016.
- [29] R. J. Diaz, P. Z. McVeigh, M. A. O'Reilly, K. Burrell, M. Bebenek, C. Smith, A. B. Etame, G. Zadeh, K. Hynynen, B. C. Wilson, and J. T. Rutka, "Focused ultrasound delivery of Raman nanoparticles across the blood-brain barrier: Potential for targeting experimental brain tumors," *Nanomedicine: Nanotechnology, Biology and Medicine*, vol. 10, no. 5, pp. e1075–e1087, Jul. 2014.
- [30] F.-Y. Yang, T.-T. Wong, M.-C. Teng, R.-S. Liu, M. Lu, H.-F. Liang, and M.-C. Wei, "Focused ultrasound and interleukin-4 receptor-targeted liposomal doxorubicin for enhanced targeted drug delivery and antitumor effect in glioblastoma multiforme," *Journal of Controlled Release*, vol. 160, no. 3, pp. 652–658, Jun. 2012.
- [31] M. Aryal, N. Vykhodtseva, Y.-Z. Zhang, and N. McDannold, "Multiple sessions of liposomal doxorubicin delivery via focused ultrasound mediated blood–brain barrier disruption: A safety study," *Journal of Controlled Release*, vol. 204, pp. 60–69, Apr. 2015.
- [32] T. Sun, Y. Zhang, C. Power, P. M. Alexander, J. T. Sutton, M. Aryal, N. Vykhodtseva, E. L. Miller, and N. J. McDannold, "Closed-loop control of targeted ultrasound drug delivery across the blood–brain/tumor barriers in a rat glioma model," *PNAS*, vol. 114, no. 48, pp. E10281–E10290, Nov. 2017.
- [33] D. Y. Zhang, C. Dmello, L. Chen, V. A. Arrieta, E. Gonzalez-Buendia, J. R. Kane, L. P. Magnusson, A. Baran, C. D. James, C. Horbinski, A. Carpentier, C. Desseaux, M. Canney, M. Muzzio, R. Stupp, and A. M. Sonabend, "Ultrasound-mediated Delivery of Paclitaxel for Glioma: A Comparative Study of Distribution, Toxicity, and Efficacy of Albumin-bound Versus Cremophor Formulations," *Clin Cancer Res*, vol. 26, no. 2, pp. 477–486, Jan. 2020.
- [34] Y.-C. Chen, C.-F. Chiang, S.-K. Wu, L.-F. Chen, W.-Y. Hsieh, and W.-L. Lin, "Targeting microbubbles-carrying TGFβ1 inhibitor combined with ultrasound sonication induce BBB/BTB disruption to enhance nanomedicine treatment for brain tumors," *Journal of Controlled Release*, vol. 211, pp. 53–62, Aug. 2015.
- [35] M. Wu, W. Chen, Y. Chen, H. Zhang, C. Liu, Z. Deng, Z. Sheng, J. Chen, X. Liu, F. Yan, and H. Zheng, "Focused Ultrasound-Augmented Delivery of Biodegradable Multifunctional Nanoplatforms for Imaging-Guided Brain Tumor Treatment," *Advanced Science*, vol. 5, no. 4, p. 1700474, 2018.
- [36] D. Coluccia, C. A. Figueiredo, M. Y. Wu, A. N. Riemenschneider, R. Diaz, A. Luck, C. Smith, S. Das, C. Ackerley, M. O'Reilly, K. Hynynen, and J. T. Rutka, "Enhancing Glioblastoma Treatment using Cisplatin-Gold-Nanoparticle Conjugates and Targeted Delivery with Magnetic Resonance-Guided Focused Ultrasound," *Nanomedicine: Nanotechnology, Biology and Medicine*, Feb. 2018.
- [37] C. T. Curley, B. P. Mead, K. Negron, N. Kim, W. J. Garrison, G. W. Miller, K. M. Kingsmore, E. A. Thim, J. Song, J. M. Munson, A. L. Klibanov, J. S. Suk, J. Hanes, and R. J. Price, "Augmentation of brain tumor interstitial flow via focused ultrasound promotes brain-penetrating nanoparticle dispersion and transfection," *Science Advances*, vol. 6, no. 18, p. eaay1344, May 2020.
- [38] Y. Guo, H. Lee, Z. Fang, A. Velalopoulou, J. Kim, M. B. Thomas, J. Liu, R. G. Abramowitz, Y. Kim, A. F. Coskun, D. P. Krummel, S. Sengupta, T. J. MacDonald, and C. Arvanitis, "Single-cell analysis reveals effective siRNA

- delivery in brain tumors with microbubble-enhanced ultrasound and cationic nanoparticles," *Science Advances*, vol. 7, no. 18, p. eabf7390, Apr. 2021.
- [39] P.-Y. Chen, H.-L. Liu, M.-Y. Hua, H.-W. Yang, C.-Y. Huang, P.-C. Chu, L.-A. Lyu, I.-C. Tseng, L.-Y. Feng, H.-C. Tsai, S.-M. Chen, Y.-J. Lu, J.-J. Wang, T.-C. Yen, Y.-H. Ma, T. Wu, J.-P. Chen, J.-I. Chuang, J.-W. Shin, C. Hsueh, and K.-C. Wei, "Novel magnetic/ultrasound focusing system enhances nanoparticle drug delivery for glioma treatment," *Neuro Oncol*, vol. 12, no. 10, pp. 1050–1060, Oct. 2010.
- [40] H.-L. Liu, M.-Y. Hua, H.-W. Yang, C.-Y. Huang, P.-C. Chu, J.-S. Wu, I.-C. Tseng, J.-J. Wang, T.-C. Yen, P.-Y. Chen, and K.-C. Wei, "Magnetic resonance monitoring of focused ultrasound/magnetic nanoparticle targeting delivery of therapeutic agents to the brain," *Proc Natl Acad Sci U S A*, vol. 107, no. 34, pp. 15205–15210, Aug. 2010.
- [41] C.-H. Fan, Y.-H. Cheng, C.-Y. Ting, Y.-J. Ho, P.-H. Hsu, H.-L. Liu, and C.-K. Yeh, "Ultrasound/Magnetic Targeting with SPIO-DOX-Microbubble Complex for Image-Guided Drug Delivery in Brain Tumors," *Theranostics*, vol. 6, no. 10, pp. 1542–1556, Jun. 2016.
- [42] C.-Y. Ting, C.-H. Fan, H.-L. Liu, C.-Y. Huang, H.-Y. Hsieh, T.-C. Yen, K.-C. Wei, and C.-K. Yeh, "Concurrent blood–brain barrier opening and local drug delivery using drug-carrying microbubbles and focused ultrasound for brain glioma treatment," *Biomaterials*, vol. 33, no. 2, pp. 704–712, Jan. 2012.
- [43] C.-H. Fan, C.-Y. Ting, H.-L. Liu, C.-Y. Huang, H.-Y. Hsieh, T.-C. Yen, K.-C. Wei, and C.-K. Yeh, "Antiangiogenic-targeting drug-loaded microbubbles combined with focused ultrasound for glioma treatment," *Biomaterials*, vol. 34, no. 8, pp. 2142–2155, Mar. 2013.
- [44] C.-H. Fan, C.-Y. Ting, H.-J. Lin, C.-H. Wang, H.-L. Liu, T.-C. Yen, and C.-K. Yeh, "SPIO-conjugated, doxorubicin-loaded microbubbles for concurrent MRI and focused-ultrasound enhanced brain-tumor drug delivery," *Biomaterials*, vol. 34, no. 14, pp. 3706–3715, May 2013.
- [45] G. Zhao, Q. Huang, F. Wang, X. Zhang, J. Hu, Y. Tan, N. Huang, Z. Wang, Z. Wang, and Y. Cheng, "Targeted shRNA-loaded liposome complex combined with focused ultrasound for blood brain barrier disruption and suppressing glioma growth," *Cancer Letters*, vol. 418, pp. 147–158, Apr. 2018.
- [46] H. Baghirova, S. Snipstad, E. Sulheim, S. Berg, R. Hansen, F. Thorsen, Y. Mørch, C. de L. Davies, and A. K. O. Åslund, "Ultrasound-mediated delivery and distribution of polymeric nanoparticles in the normal brain parenchyma of a metastatic brain tumour model," *PLOS ONE*, vol. 13, no. 1, p. e0191102, Jan. 2018.
- [47] F.-Y. Yang, W.-Y. Chang, W.-T. Lin, J.-J. Hwang, Y.-C. Chien, H.-E. Wang, and M.-L. Tsai, "Focused ultrasound enhanced molecular imaging and gene therapy for multifusion reporter gene in glioma-bearing rat model," *Oncotarget*, vol. 6, no. 34, pp. 36260–36268, Sep. 2015.
- [48] E.-L. Chang, C.-Y. Ting, P.-H. Hsu, Y.-C. Lin, E.-C. Liao, C.-Y. Huang, Y.-C. Chang, H.-L. Chan, C.-S. Chiang, H.-L. Liu, K.-C. Wei, C.-H. Fan, and C.-K. Yeh, "Angiogenesis-targeting microbubbles combined with ultrasound-mediated gene therapy in brain tumors," *Journal of Controlled Release*, vol. 255, pp. 164–175, Jun. 2017.
- [49] N. McDannold, Y. Zhang, J. G. Supko, C. Power, T. Sun, C. Peng, N. Vykhodtseva, A. J. Golby, and D. A. Reardon, "Acoustic feedback enables safe and reliable carboplatin delivery across the blood-brain barrier with a clinical focused ultrasound system and improves survival in a rat glioma model," *Theranostics*, vol. 9, no. 21, pp. 6284–6299, 2019.
- [50] N. McDannold, C. D. Arvanitis, N. Vykhodtseva, and M. S. Livingstone, "Temporary Disruption of the Blood–Brain Barrier by Use of Ultrasound and Microbubbles: Safety and Efficacy Evaluation in Rhesus Macaques," *Cancer Res*, vol. 72, no. 14, pp. 3652–3663, Jul. 2012.
- [51] C. D. Arvanitis, M. S. Livingstone, N. Vykhodtseva, and N. McDannold, "Controlled Ultrasound-Induced Blood-Brain Barrier Disruption Using Passive Acoustic Emissions Monitoring," *PLOS ONE*, vol. 7, no. 9, p. 16, 2012.
- [52] E. E. Konofagou, "Optimization of the Ultrasound-Induced Blood-Brain Barrier Opening," *Theranostics*, vol. 2, no. 12, pp. 1223–1237, Dec. 2012.
- [53] F. Marquet, Y.-S. Tung, T. Teichert, V. P. Ferrera, and E. E. Konofagou, "Noninvasive, Transient and Selective Blood-Brain Barrier Opening in Non-Human Primates In Vivo," *PLOS ONE*, vol. 6, no. 7, p. e22598, 22 2011.
- [54] Y.-S. Tung, F. Vlachos, J. J. Choi, T. Deffieux, K. Selert, and E. E. Konofagou, "In vivo transcranial cavitation threshold detection during ultrasound-induced blood–brain barrier opening in mice," *Phys. Med. Biol.*, vol. 55, no. 20, pp. 6141–6155, Oct. 2010.

- [55] Y.-S. Tung, F. Vlachos, J. A. Feshitan, M. A. Borden, and E. E. Konofagou, "The mechanism of interaction between focused ultrasound and microbubbles in blood-brain barrier opening in mice," *The Journal of the Acoustical Society of America*, vol. 130, no. 5, pp. 3059–3067, Nov. 2011.
- [56] S.-Y. Wu, Y.-S. Tung, F. Marquet, M. E. Downs, C. S. Sanchez, C. C. Chen, V. Ferrera, and E. Konofagou, "Transcranial Cavitation Detection in Primates during Blood-Brain Barrier Opening – A Performance Assessment Study," *IEEE Trans Ultrason Ferroelectr Freq Control*, vol. 61, no. 6, pp. 966–978, Jun. 2014.
- [57] P.-C. Chu, W.-Y. Chai, C.-H. Tsai, S.-T. Kang, C.-K. Yeh, and H.-L. Liu, "Focused Ultrasound-Induced Blood-Brain Barrier Opening: Association with Mechanical Index and Cavitation Index Analyzed by Dynamic Contrast-Enhanced Magnetic-Resonance Imaging," *Sci Rep*, vol. 6, Sep. 2016.
- [58] N. McDannold, N. Vykhodtseva, and K. Hynynen, "Targeted disruption of the blood–brain barrier with focused ultrasound: association with cavitation activity," *Phys. Med. Biol.*, vol. 51, no. 4, pp. 793–807, Feb. 2006.
- [59] S.-Y. Wu, S. M. Fix, C. B. Arena, C. C. Chen, W. Zheng, O. O. Olumolade, V. Papadopoulou, A. Novell, P. A. Dayton, and E. E. Konofagou, "Focused ultrasound-facilitated brain drug delivery using optimized nanodroplets: vaporization efficiency dictates large molecular delivery," *Phys. Med. Biol.*, vol. 63, no. 3, p. 035002, Jan. 2018.
- [60] O. O. Olumolade, S. Wang, G. Samiotaki, and E. E. Konofagou, "Longitudinal Motor and Behavioral Assessment of Blood–Brain Barrier Opening with Transcranial Focused Ultrasound," *Ultrasound in Medicine & Biology*, vol. 42, no. 9, pp. 2270–2282, Sep. 2016.
- [61] C. Sierra, C. Acosta, C. Chen, S.-Y. Wu, M. E. Karakatsani, M. Bernal, and E. E. Konofagou, "Lipid microbubbles as a vehicle for targeted drug delivery using focused ultrasound-induced blood–brain barrier opening," *J Cereb Blood Flow Metab*, vol. 37, no. 4, pp. 1236–1250, Apr. 2017.
- [62] S.-Y. Wu, C. C. Chen, Y.-S. Tung, O. O. Olumolade, and E. E. Konofagou, "Effects of the microbubble shell physicochemical properties on ultrasound-mediated drug delivery to the brain," *Journal of Controlled Release*, vol. 212, pp. 30–40, Aug. 2015.
- [63] F. MARQUET, Y.-S. TUNG, and E. E. KONOFAGOU, "FEASIBILITY STUDY OF A CLINICAL BLOOD–BRAIN BARRIER OPENING ULTRASOUND SYSTEM," *Nano Life*, vol. 1, no. 3n04, p. 309, 2010.
- [64] Z. Kovacs, B. Werner, A. Rassi, J. O. Sass, E. Martin-Fiori, and M. Bernasconi, "Prolonged survival upon ultrasound-enhanced doxorubicin delivery in two syngenic glioblastoma mouse models," *Journal of Controlled Release*, vol. 187, pp. 74–82, Aug. 2014.
- [65] H.-L. Liu, M.-Y. Hua, P.-Y. Chen, P.-C. Chu, C.-H. Pan, H.-W. Yang, C.-Y. Huang, J.-J. Wang, T.-C. Yen, and K.-C. Wei, "Blood-brain barrier disruption with focused ultrasound enhances delivery of chemotherapeutic drugs for glioblastoma treatment," *Radiology*, vol. 255, no. 2, pp. 415–425, May 2010.
- [66] H.-L. Liu, C.-Y. Huang, J.-Y. Chen, H.-Y. J. Wang, P.-Y. Chen, and K.-C. Wei, "Pharmacodynamic and Therapeutic Investigation of Focused Ultrasound-Induced Blood-Brain Barrier Opening for Enhanced Temozolomide Delivery in Glioma Treatment," *PLoS One*, vol. 9, no. 12, Dec. 2014.
- [67] H.-J. Wei, P. S. Upadhyayula, A. N. Pouliopoulos, Z. K. Englander, X. Zhang, C.-I. Jan, J. Guo, A. Mela, Z. Zhang, T. J. C. Wang, J. N. Bruce, P. D. Canoll, N. A. Feldstein, S. Zacharoulis, E. E. Konofagou, and C.-C. Wu, "Focused Ultrasound-Mediated Blood-Brain Barrier Opening Increases Delivery and Efficacy of Etoposide for Glioblastoma Treatment," *International Journal of Radiation Oncology\*Biophysics\*Physics*, vol. 110, no. 2, pp. 539–550, Jun. 2021.
- [68] P.-Y. Chen, H.-Y. Hsieh, C.-Y. Huang, C.-Y. Lin, K.-C. Wei, and H.-L. Liu, "Focused ultrasound-induced blood-brain barrier opening to enhance interleukin-12 delivery for brain tumor immunotherapy: a preclinical feasibility study," *J Transl Med*, vol. 13, p. 93, 2015.
- [69] H.-L. Liu, P.-H. Hsu, C.-Y. Lin, C.-W. Huang, W.-Y. Chai, P.-C. Chu, C.-Y. Huang, P.-Y. Chen, L.-Y. Yang, J. S. Kuo, and K.-C. Wei, "Focused Ultrasound Enhances Central Nervous System Delivery of Bevacizumab for Malignant Glioma Treatment," *Radiology*, vol. 281, no. 1, pp. 99–108, 2016.
- [70] N. D. Sheybani, V. R. Breza, S. Paul, K. S. McCauley, S. S. Berr, G. W. Miller, K. D. Neumann, and R. J. Price, "ImmunoPET-informed sequence for focused ultrasound-targeted mCD47 blockade controls glioma," *Journal of Controlled Release*, vol. 331, pp. 19–29, Mar. 2021.
- [71] L. H. Treat, N. McDannold, Y. Zhang, N. Vykhodtseva, and K. Hynynen, "Improved anti-tumor effect of liposomal doxorubicin after targeted blood-brain barrier disruption by MRI-guided focused ultrasound in rat glioma," *Ultrasound Med Biol*, vol. 38, no. 10, pp. 1716–1725, Oct. 2012.

- [72] M. Aryal, N. Vykhodtseva, Y.-Z. Zhang, J. Park, and N. McDannold, "Multiple treatments with liposomal doxorubicin and ultrasound-induced disruption of blood-tumor and blood-brain barriers improve outcomes in a rat glioma model," *J Control Release*, vol. 169, no. 1–2, pp. 103–111, Jul. 2013.
- [73] Y. Shen, Z. Pi, F. Yan, C.-K. Yeh, X. Zeng, X. Diao, Y. Hu, S. Chen, X. Chen, and H. Zheng, "Enhanced delivery of paclitaxel liposomes using focused ultrasound with microbubbles for treating nude mice bearing intracranial glioblastoma xenografts," *Int J Nanomedicine*, vol. 12, pp. 5613–5629, 2017.
- [74] M. Wu, W. Chen, Y. Chen, H. Zhang, C. Liu, Z. Deng, Z. Sheng, J. Chen, X. Liu, F. Yan, and H. Zheng, "Focused Ultrasound-Augmented Delivery of Biodegradable Multifunctional Nanoplatfoms for Imaging-Guided Brain Tumor Treatment," *Adv Sci (Weinh)*, vol. 5, no. 4, p. 1700474, Apr. 2018.
- [75] G. Zhao, Q. Huang, F. Wang, X. Zhang, J. Hu, Y. Tan, N. Huang, Z. Wang, Z. Wang, and Y. Cheng, "Targeted shRNA-loaded liposome complex combined with focused ultrasound for blood brain barrier disruption and suppressing glioma growth," *Cancer Letters*, vol. 418, pp. 147–158, Apr. 2018.
